# Supplementary material for: Switching selectivity between Pb2+and Hg2+ions through variation of substituents at xanthene end; ‘turn-on’ signalling responses by FRET modulation
Source: Royal Society of Chemistry journal article supplement (doi:10.1039/c4ra04152f), 2014-01-01
Supplement: c4ra04152f1.pdf [file c4ra04152f1.pdf]

## Switching selectivity between $\text{Pb}^{2+}$ and $\text{Hg}^{2+}$ ions through variation of substituents at xanthene end; 'turn-on' signalling responses by FRET modulation

Biswonath Biswal and Bamaprasad Bag\*

Colloids and Materials Chemistry Department, Academy of Scientific and Innovative Research, CSIR-Institute of Minerals and Materials Technology, P.O.: R.R.L., Bhubaneswar-751 013, Odisha, India. Fax: (+) 91 674 258 1637; Tel: (+ 91) 674 237 9254, Email: *bpbag@immt.res.in*

### Electronic Supplementary Information

|                                                                                                                                                                                  |         |
|----------------------------------------------------------------------------------------------------------------------------------------------------------------------------------|---------|
| Methods of determination of fluorescence quantum yield and complex association constants:                                                                                        | S2      |
| Absorption and emission spectral of $\text{L}_1$ - $\text{L}_4$ and Metal ion induced optical signal modulation under various conditions, determination of association constants | S4-S13  |
| <i>Characterization (NMR and ESI-MS) Spectra</i>                                                                                                                                 | S14-S19 |

## Materials and methods:

All the reagent grade chemicals were used as received and without purification unless mentioned otherwise. All the solvents were freshly distilled prior to use for fluorescence measurements by following the literature procedures and all the reactions were carried out under a N<sub>2</sub> atmosphere. Chromatographic separations were done by column chromatography using 100–200mesh silica gel or neutral alumina. The compounds were characterized by elemental analysis, <sup>1</sup>H-NMR, <sup>13</sup>C-NMR and mass(ESI) spectroscopy. <sup>1</sup>H-NMR and <sup>13</sup>C-NMR spectra were recorded on a JEOL JNM-AL400FTV 4.0 AL 400(400MHz) instrument in CDCl<sub>3</sub> with Me<sub>4</sub>Si as the internal standard. Electrospray mass spectral data were recorded on a MICROMASS QUATTROII Triple quadruple mass spectrometer. The dissolved samples of the compounds in suitable solvents were introduced into the ESI source through a syringe pump at the rate of 5 mL min<sup>-1</sup>, ESI capillary was set at 3.5kV with 40V cone voltage and the spectra were recorded at 6s scans. Melting points were determined with a melting point apparatus by BIBBY Scientific limited, India and were uncorrected. Elemental analyses were done in an Elementar Vario ELIII Carlo Erba 1108 elemental analyzer. The single crystal data was collected using Bruker-Kappa Apex II X-ray diffractometer. UV–visible spectra were recorded on a Perkin Elmer Lambda 650 UV/VIS spectrophotometer at 298K in 10<sup>-5</sup>M concentration. Steady-state fluorescence spectra were obtained with a Fluoromax 4P spectrofluorometer at 298 K with very dilute solutions (1-0.01μM) of the samples to avoid auto quenching. As required in case to case basis, fluorescence quantum yields were determined by comparing the corrected spectrum with that of either rhodamine G (φ<sub>F</sub> = 0.95) or anthracene(φ<sub>F</sub> = 0.297) in EtOH by taking area under total emission using following eqn.,

$$\phi_S = \phi_R \left( \frac{F_S A_R}{F_R A_S} \right) \cdot \left( \frac{\eta_S}{\eta_R} \right)^2 \quad \dots\dots \quad \dots\dots \text{eqn. S1}$$

where φ<sub>S</sub> and φ<sub>R</sub> are the radiative quantum yields, F<sub>S</sub> and F<sub>R</sub> are the area under the fluorescence spectra, A<sub>S</sub> and A<sub>R</sub> are the absorbance (at the excited wavelength) of the respective sample and the reference; η<sub>S</sub> and η<sub>R</sub> are the refractive indices of the solvent used for the sample and the reference. The quantum yield of Rhodamine G was measured using quinine sulfate in 1N H<sub>2</sub>SO<sub>4</sub> as reference excited at (λ<sub>ex</sub>) 350 nm. The standard quantum yield value thus obtained was used for the calculation of the quantum yield of the samples.

The complex stability constants<sup>22</sup> (K<sub>s</sub>) of the probes with various metal ions and their detection limit<sup>26</sup> were determined following known methods. The Pb<sup>2+</sup>-L<sub>2</sub> interaction in incubated *E. Coli* were probed using a Nikon 80i (Nikon Inc., Japan) fluorescence

microscope. Deionised water was used for all experiments, no buffer were used to avoid cross contamination unless otherwise specified for pH studies.

The singlet-singlet excitation energy transfer ( $\eta_{\text{EET}}$ ) efficiency between anthracene( $D_{\text{An}}$ ) donor and rhodamine( $A_{\text{Rh}}$ ) acceptor was evaluated from steady-state fluorescence data following the equation (eqn. S2).

$$\eta_{\text{EET}} = 1 - F_{\text{DA}} / F_{\text{D}} \dots \dots \dots \text{Eqn. S2.}$$

where  $F_{\text{DA}}$  and  $F_{\text{D}}$  are the fluorescence intensities of donor ( $D_{\text{An}}$ ) in presence and absence of the acceptor respectively.

Forster's critical distance ( $R_0$ ), the distance at which 50% energy transfer takes place in between donor and acceptor pair was determined following equation (eqn. S3)

$$R_0 = 0.2108 \times [\kappa^2 \times \phi_D \times n_R^{-4} \times J(\lambda)]^{1/6} \dots \dots \dots \text{Eqn. S3}$$

where  $\kappa^2$  is the orientation factor between emission and absorption dipoles which depends on their relative orientation,  $\phi_D$  is quantum yield of donor in absence of receptor,  $n_R$  is refractive index of medium, and  $J(\lambda)$  is overlap integral of fluorescence emission spectrum of the donor and absorption spectrum of the acceptor which is expressed as shown in eqn. S4.

$$J(\lambda) = \int_0^\infty F_D(\lambda) \times \epsilon_A(\lambda) \times (\lambda)^4 \times d\lambda \dots \dots \dots \text{Eqn. S4}$$

where  $F_D$  is the normalized fluorescence of the donor,  $\epsilon_A$  is the molar extinction coefficient of the acceptor (in  $\text{dm}^3 \text{mol}^{-1} \text{cm}^{-1}$ ) and  $\lambda$  is the wavelength in nm.

#### ***Determination of association constant ( $K_a$ ):***

The association constant ( $K_a$ ) of the complex were determined from the change in absorbance or fluorescence resulted from titration of dilute solutions ( $\sim 10^{-5}$ - $10^{-7}$  M) of probes against metal ion solution following Benesi-Hildebrand method for a complexation of 1:1 (ligand: metal) stoichiometry as depicted in eqn.S5, *i. e.*

$$1/(X-X_0) = 1/\{K_a(X_{\text{max}}-X_0)[M(\text{II})]\} + 1/(X_{\text{max}}-X_0) \dots \dots \dots \text{Eqn. S5}$$

where  $X_0$  is absorbance or fluorescence of **probe** at a particular wavelength,  $X$  is absorbance or fluorescence intensity obtained with added  $[M(\text{II})]$ ,  $X_{\text{max}}$  is absorbance or fluorescence obtained with excess amount of metal ion added and  $[M(\text{II})]$  is concentration of metal ion added. The double reciprocal plot of absorption or fluorescence spectral change  $\{1/(X-X_0)\}$  as a function of added metal ion concentration ( $1/[M^{2+}]$ ) results in a linear regression and its slope determines  $K_a$ .

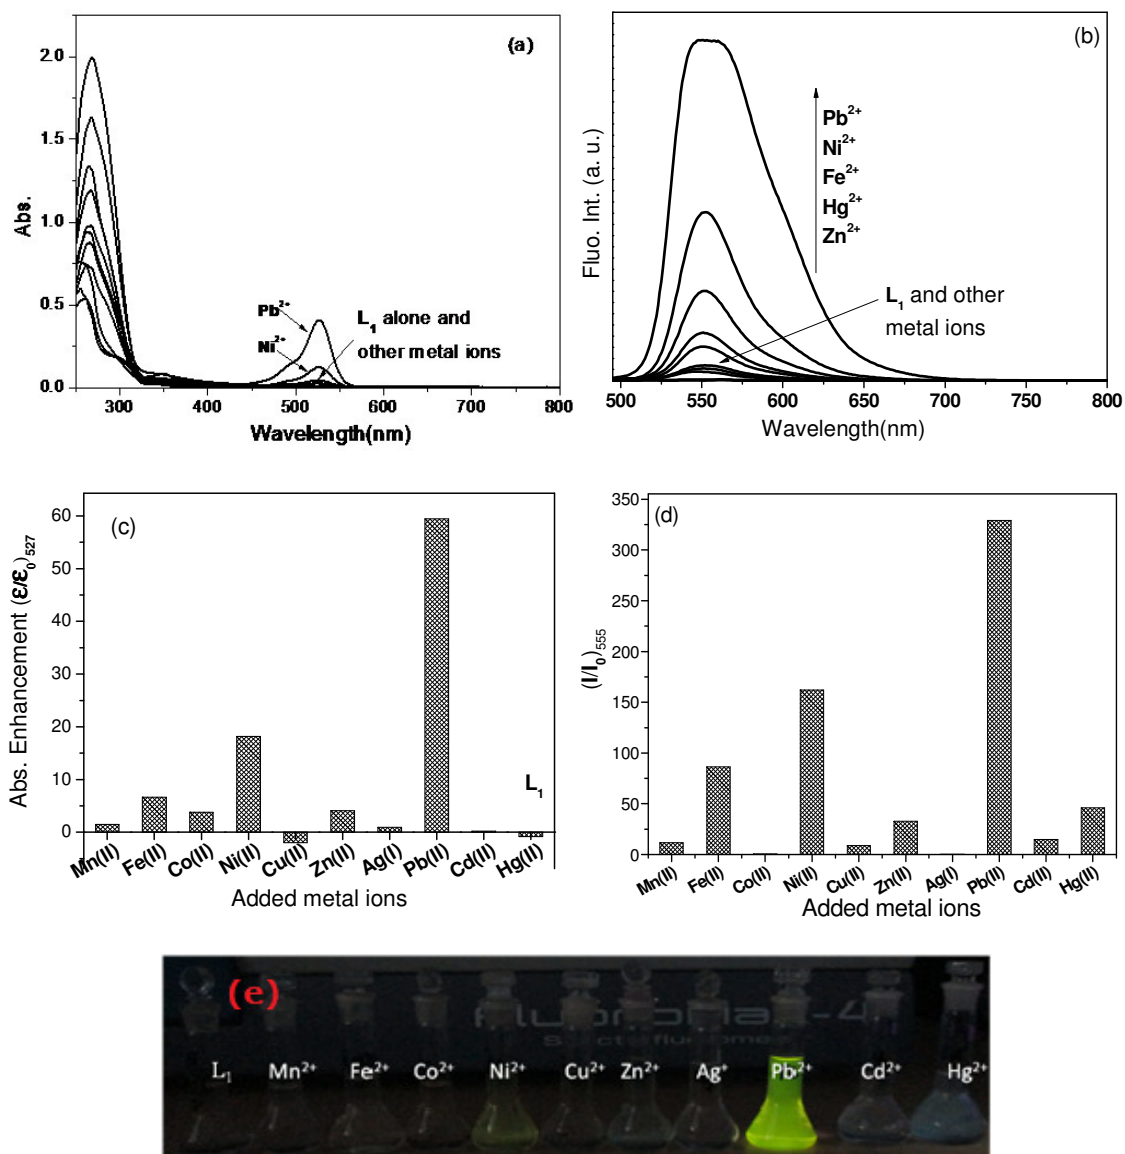

**Fig. S1:** (a) Absorption and (b) fluorescence spectra of  $L_1$  in absence and presence of various metal ions in  $CH_3CN-H_2O$  (9.5 : 0.5 v/v) and the corresponding metal ion induced absorption (c) and fluorescence (d) enhancements. (e) Photograph depicting colour of the solution after addition of metal ions under 350 nm illumination.  $[L_1] = 10 \mu M$  (abs),  $1 \mu M$  (em),  $\lambda_{ex} = 480$  nm, em. and ex. bp = 5 nm, RT.  $[M^{+1/+2}] = 50 \mu M$  (abs),  $10 \mu M$  (em).

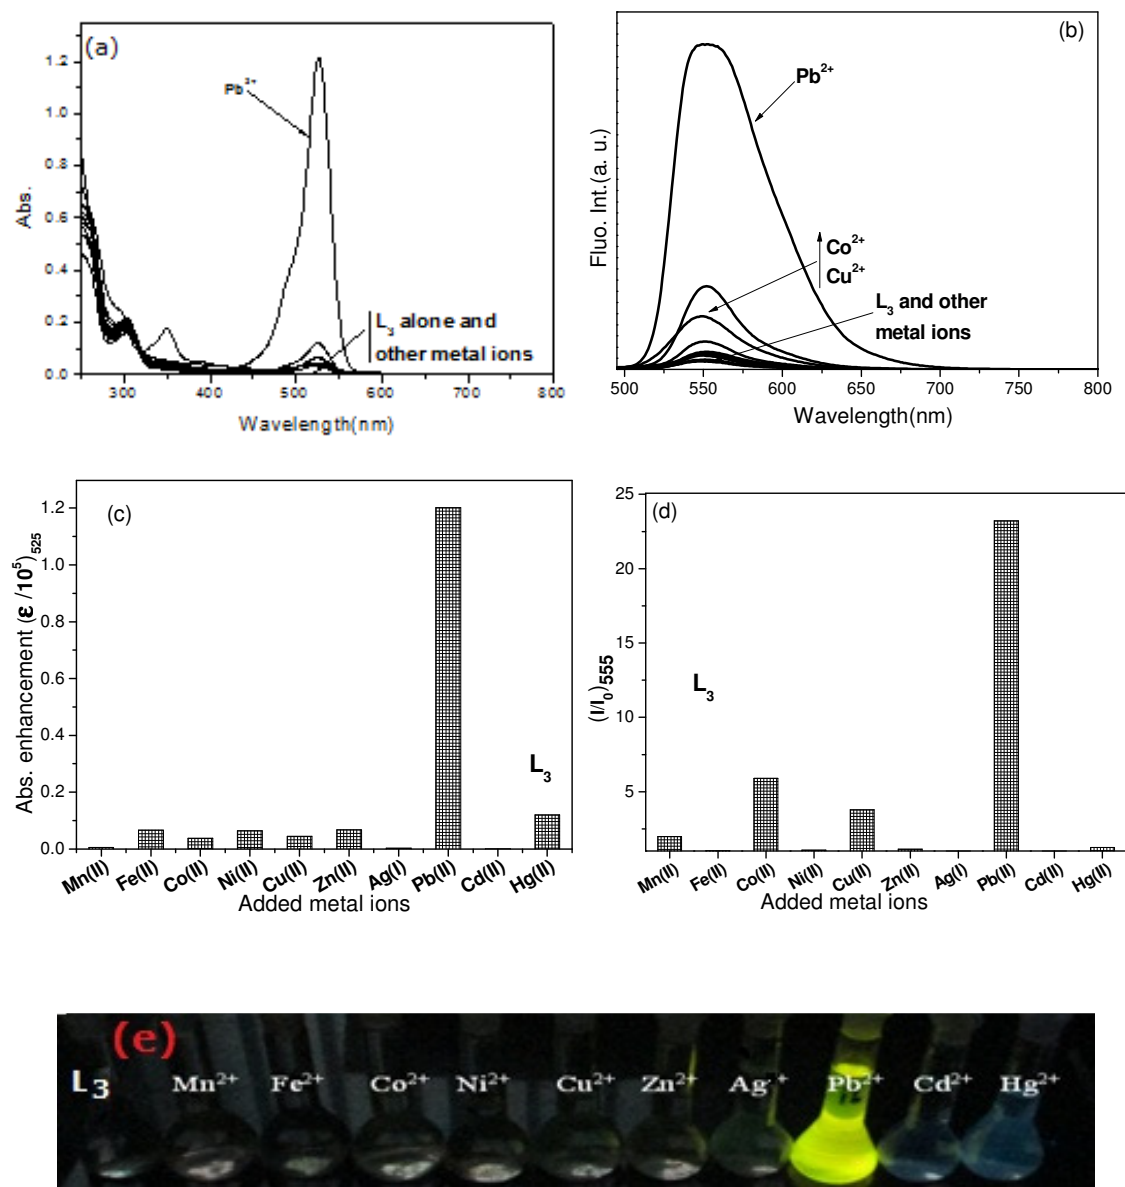

**Fig. S2.** (a) Absorption and (b) fluorescence spectra of  $L_3$  in absence and presence of various metal ions in  $CH_3CN-H_2O$  (9.5 : 0.5 v/v) and the corresponding metal ion induced absorption (c) and fluorescence (d) enhancements. (e) Photograph depicting colour of the solution after addition of metal ions under 350 nm illumination.  $[L_3] = 10 \mu M$  (abs),  $1 \mu M$  (em),  $\lambda_{ex} = 480$  nm, em. and ex. bp = 5 nm, RT.  $[M^{+1/+2}] = 50 \mu M$  (abs),  $10 \mu M$  (em).

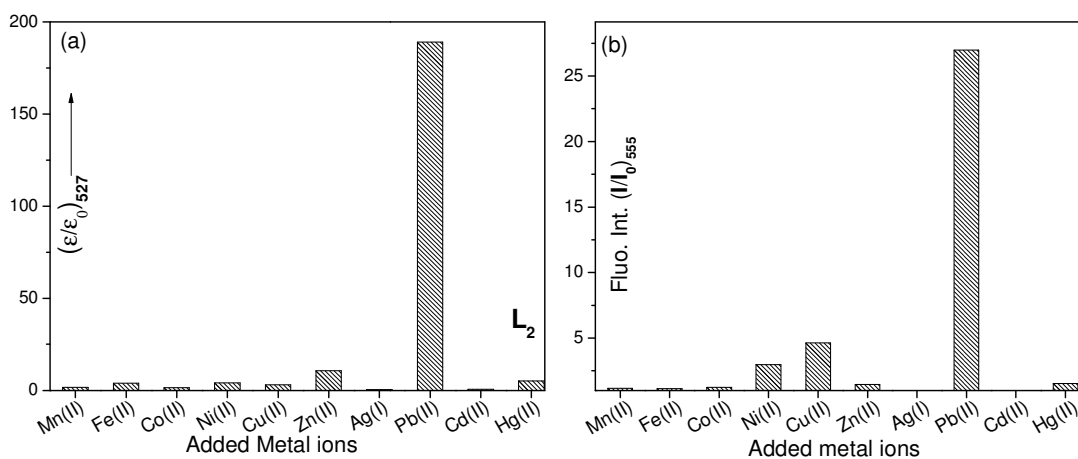

**Fig. S3.** (a) Absorption( $A_{527}$ ) and (b) fluorescence( $I_{555}$ ) spectral enhancements of  $L_2$  in presence of various metal ions in  $CH_3CN-H_2O(9.5 : 0.5 \text{ v/v})$ .  $[L_2]=10\mu M$  (abs),  $1\mu M$  (em),  $\lambda_{ex}=350 \text{ nm}$ , em. and ex. bp =  $5\text{nm}$ , RT.  $[M^{+1/+2}] = 50\mu M$ (abs),  $10\mu M$  (em).

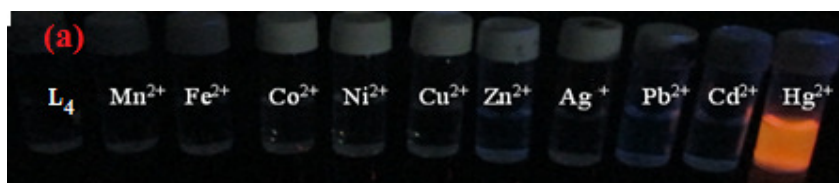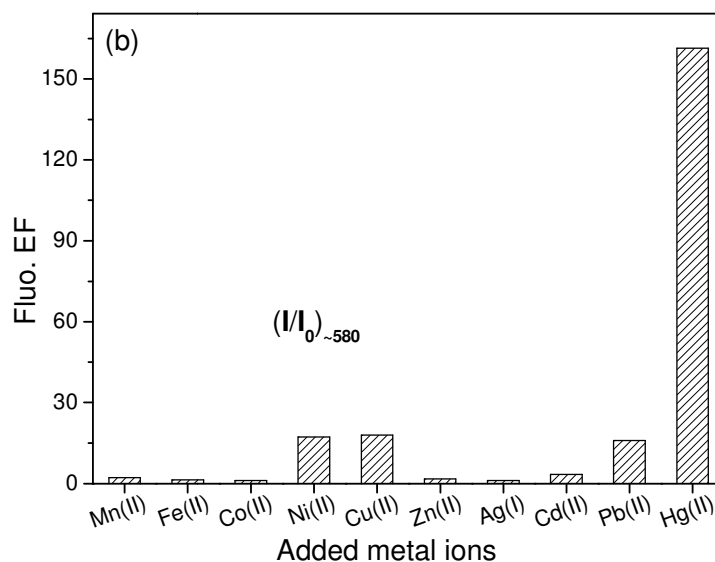

**Fig. S4.** (a) Photograph depicting colour of the solution of  $L_4$  in  $CH_3CN-H_2O(9.5 : 0.5 \text{ v/v})$  after addition of metal ions under  $350\text{nm}$  illumination, (b) corresponding metal ion induced fluorescence enhancements.  $[L_4]=1\mu M$ ,  $\lambda_{ex}=500 \text{ nm}$ , em. and ex. bp =  $5\text{nm}$ , RT,  $[M^{+1/+2}] = 10\mu M$  (em), monitored at  $580 \text{ nm}$ .

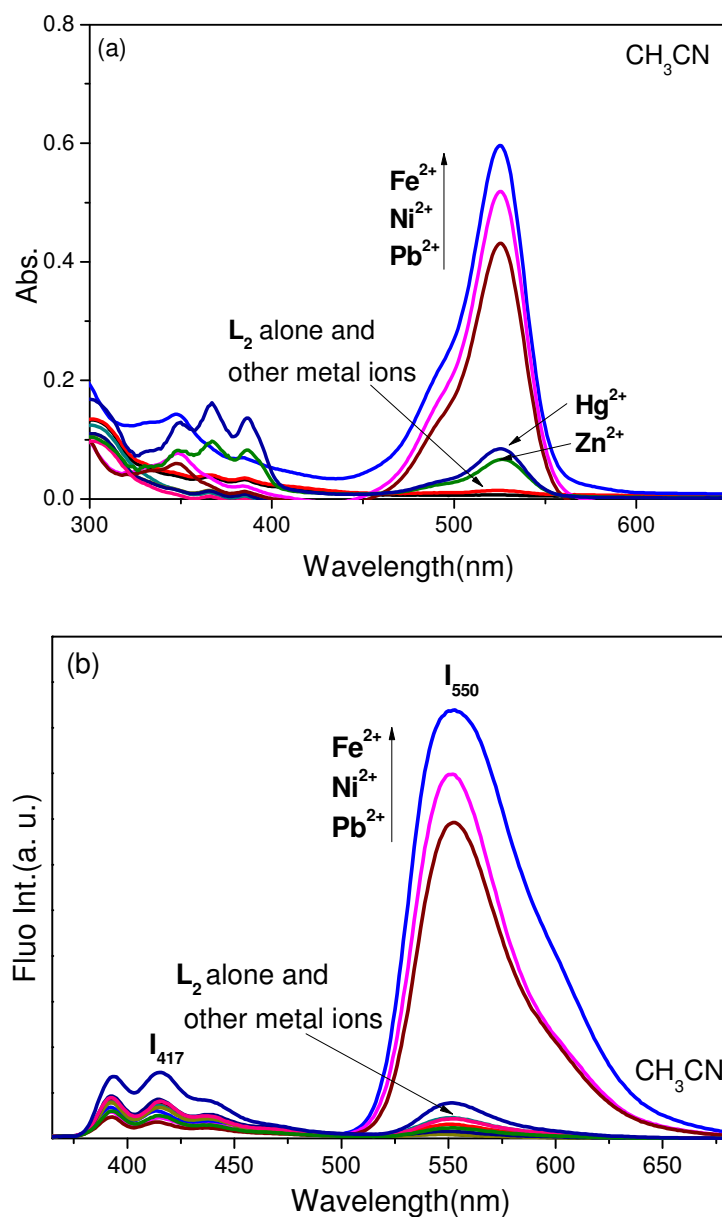

**Fig. S5.** (a) Absorption and (b) emission spectral pattern of  $L_2$  in absence and presence of various metal ions in **dry acetonitrile** medium [ $L_2$ ]=10 $\mu$ M (abs), 1 $\mu$ M (em),  $\lambda_{ex}$ = 350nm, em. and ex. bp = 5nm, RT. [ $M^{+1/+2}$ ] = 50 $\mu$ M(abs), 10 $\mu$ M (em).

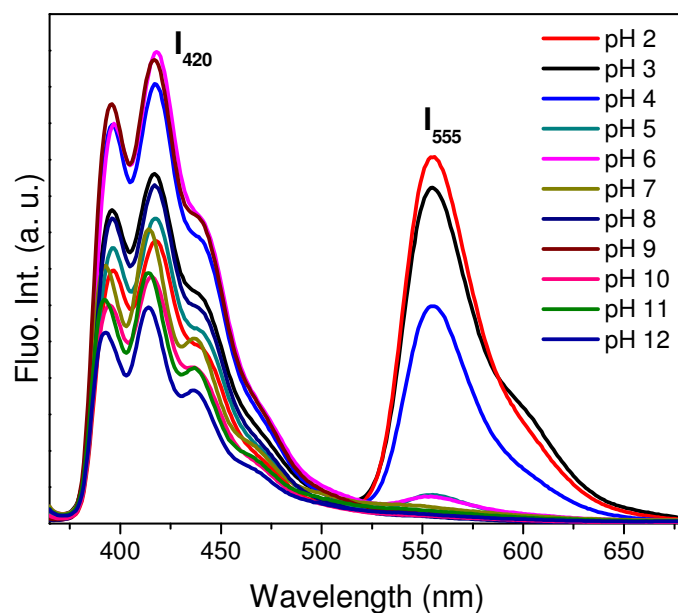

**Fig. S6.** Emission spectral pattern of  $L_2$  alone in various pH.  $[L_2] = 1\mu\text{M}$ ,  $\lambda_{\text{ex}} = 350\text{nm}$ , em. and ex. bp = 5nm, RT.

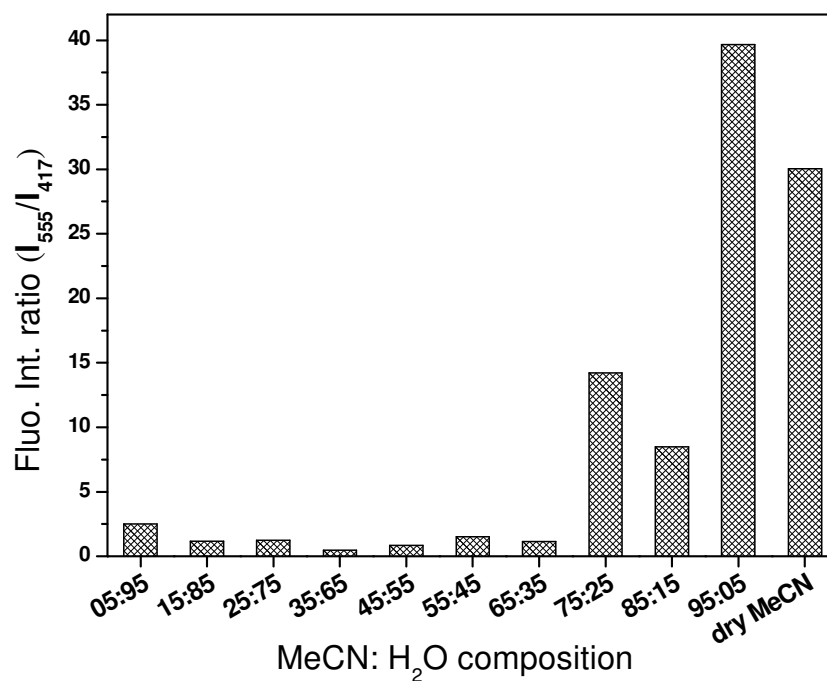

**Fig. S7.** Fluorescence spectral ratio ( $I_{555}/I_{417}$ ) of  $L_2$  in presence of  $\text{Pb}^{2+}$  in various binary composition of  $\text{CH}_3\text{CN}$  and  $\text{H}_2\text{O}$  solvent mixture.  $[L_2] = 1\mu\text{M}$ ,  $[\text{Pb}^{2+}] = 10\mu\text{M}$ ,  $\lambda_{\text{ex}} = 350\text{nm}$ , em. and ex. bp = 5nm, RT.

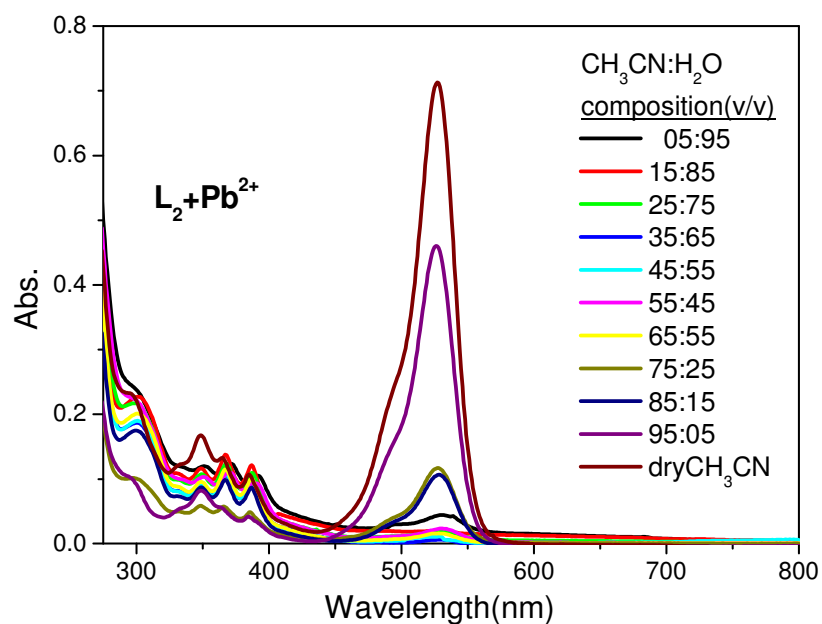

**Fig. S8.** Absorption spectral pattern of  $L_2$  in presence of  $Pb^{2+}$  in different binary composition of  $CH_3CN$  and  $H_2O$  as solvent.  $[L_2] = 10\mu M$ ,  $[Pb^{2+}] = 50\mu M$ .

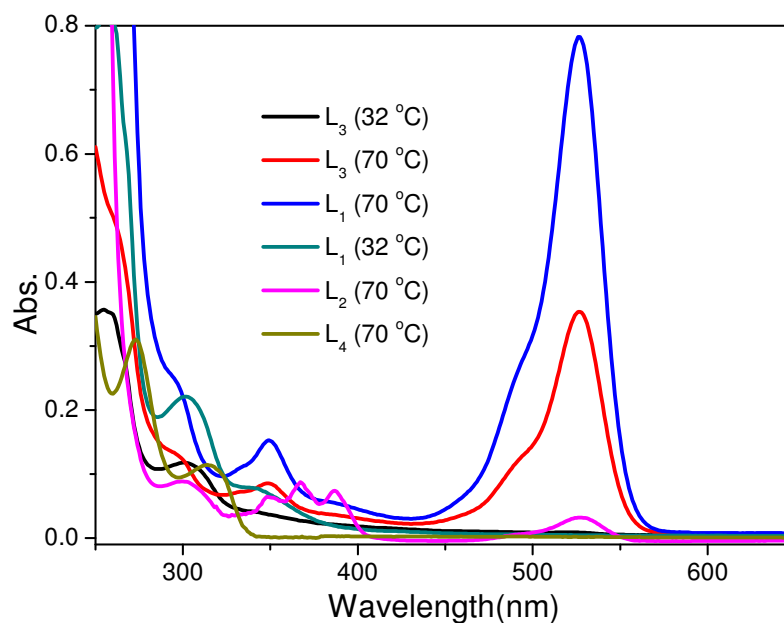

**Fig. S9.** Absorption spectra of all probes ( $L_1$ ,  $L_2$ ,  $L_3$  and  $L_4$ ) alone in ethanol measured at two different temperatures (32 °C and 70 °C) showing their stability.

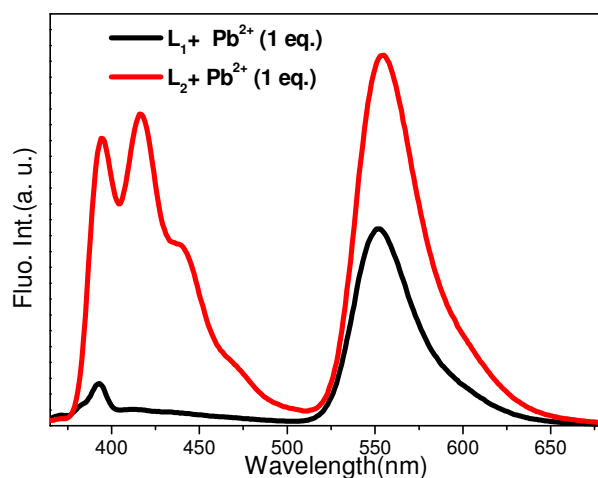

**Fig. S10.** Comparison of fluorescence spectra of  $L_1$  and  $L_2$  in presence of  $Pb^{2+}$  (1 eq.) in MeCN- $H_2O$ (9.5:0.5(v/v)) medium when excited at 350nm.  $[L_1] = [L_2] = [Pb^{2+}] = 1 \mu M$ ,  $\lambda_{ex} = 350$ nm, em. and ex. bp = 5nm, RT, the spectra were recorded after 1h of mixing.

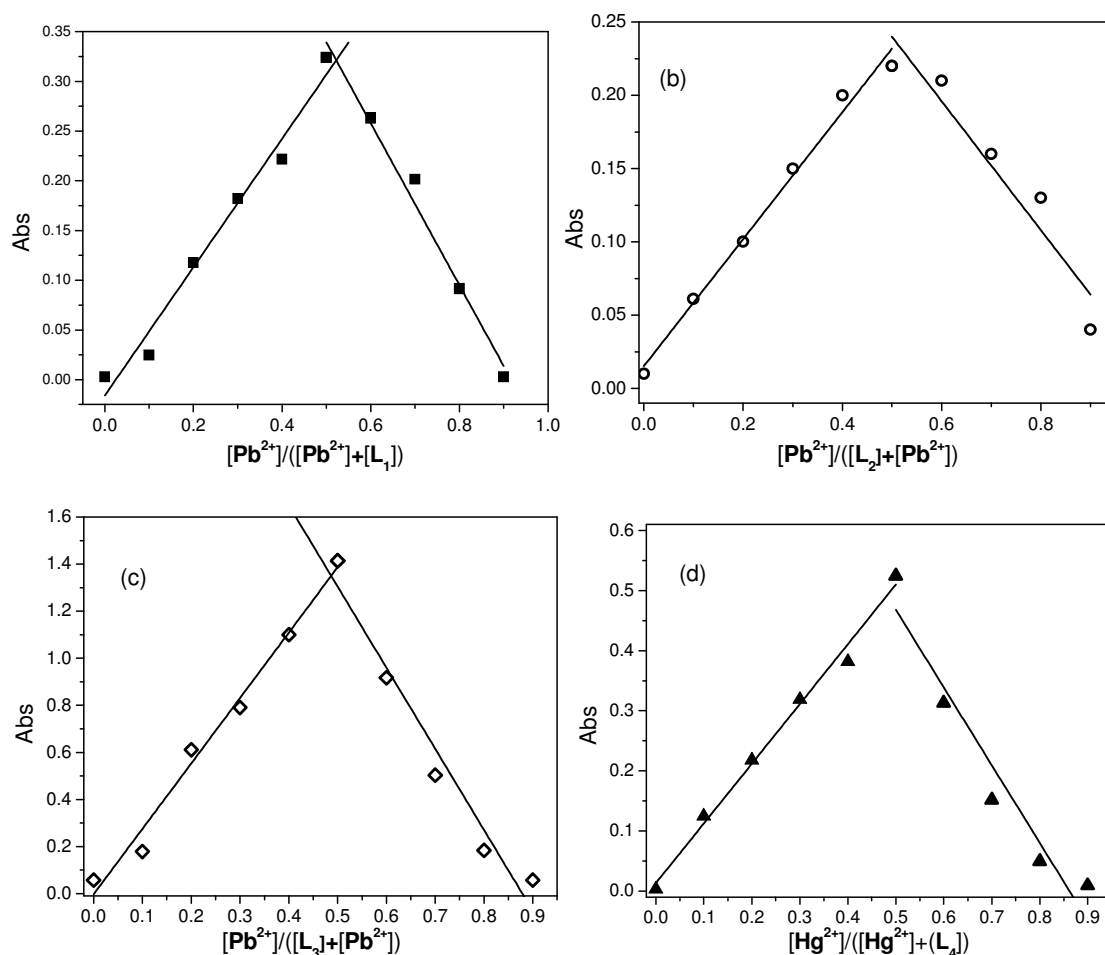

**Fig. S11.** Job's plot( $A_{Rh}$ ) of  $L_1$ (a),  $L_2$ (b), and  $L_3$ (c) with mole fractions of added  $Pb^{2+}$  and  $L_4$ (d) with that of added  $Hg^{2+}$  in MeCN- $H_2O$ (9.5:0.5 v/v) for determination of complexation stoichiometry, which was found to be in 1:1 (L:M) ratio.

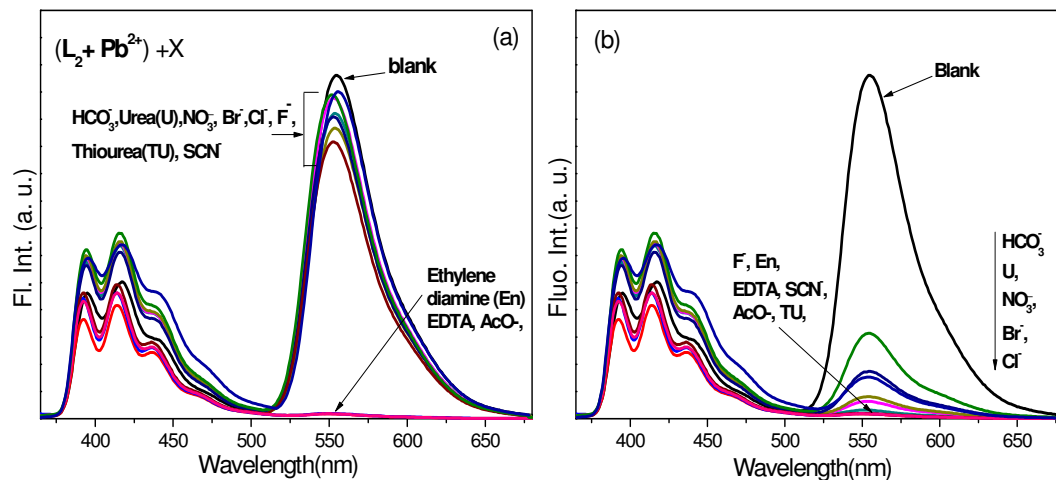

**Fig. S12.** Fluorescence spectra of  $L_2$ - $Pb^{2+}$  in absence and presence of anions and chelating reagents in  $CH_3CN$ - $H_2O$  (9.5: 0.5 v/v),  $\lambda_{ex}$  = 350nm, em and ex bp = 5nm, RT,  $[L_2]$  =  $1\mu M$ ,  $[Pb^{2+}]$  =  $5\mu M$ , [anions] =  $10\mu M$ . The spectra were recorded (a) immediate and (b) after 12h of addition of anions.

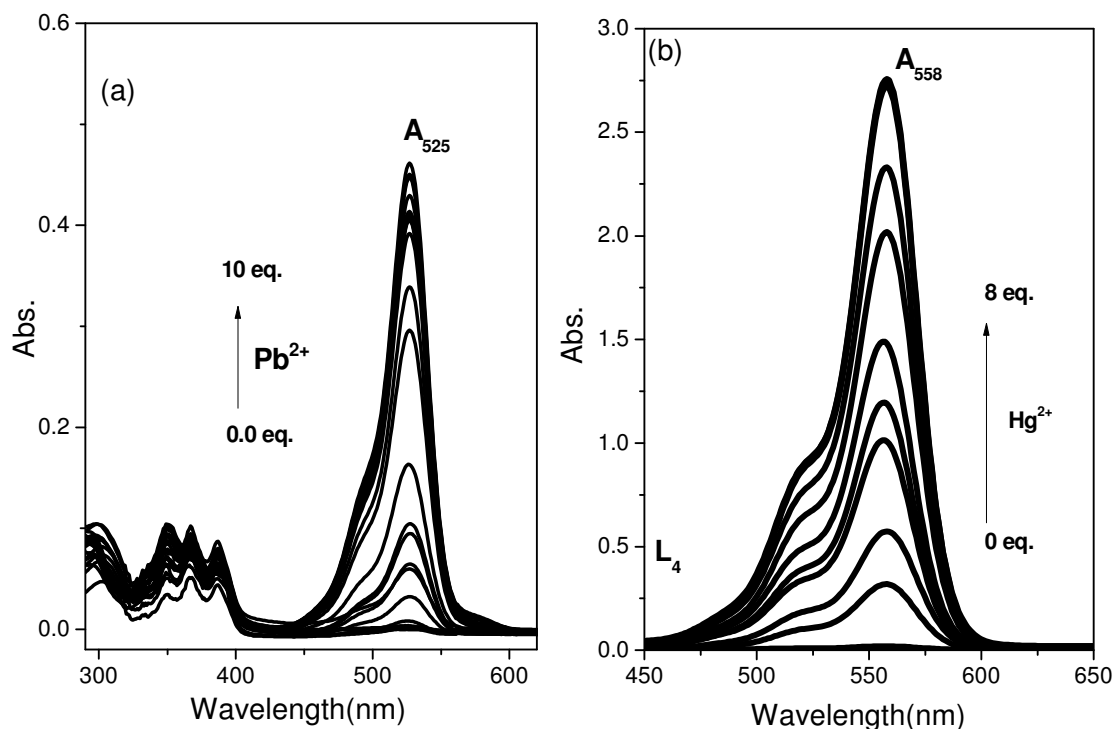

**Fig. S13.** Absorption spectral pattern of (a)  $L_2$  as a function of added  $Pb^{2+}$  and (b)  $L_4$  as a function of added  $Hg^{2+}$  ions. The titration profile has been used to determine respective association constants of complexation.  $[L_2]$  =  $1 \times 10^{-5} M$ ,  $[L_4]$  =  $1 \times 10^{-4} M$ ,  $CH_3CN$ - $H_2O$  (9.5: 0.5 v/v).

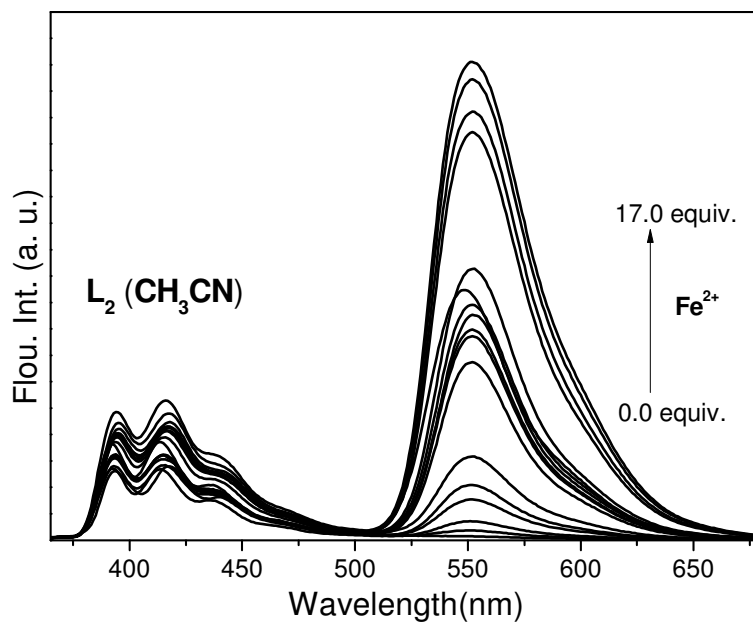

**Fig. S14.** Absorption spectral pattern of (a)  $L_2$  ( $1\mu\text{M}$ ) as a function of added  $\text{Fe}^{2+}$  ion in **dry**  $\text{CH}_3\text{CN}$  as solvent.  $\lambda_{\text{ex}} = 350\text{nm}$ , em and ex bp = 5nm, RT.

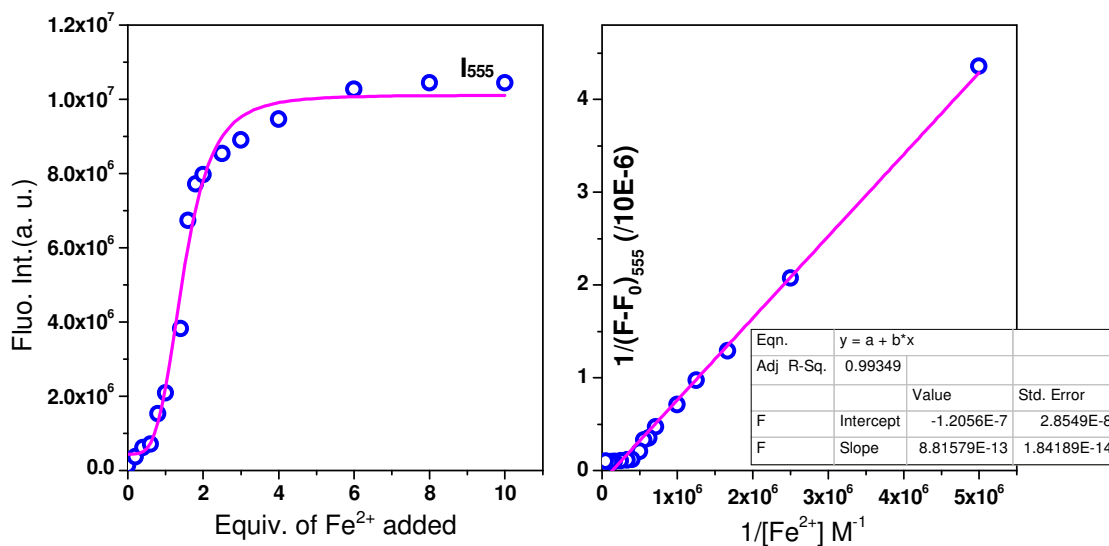

**Fig. S15.** (a) Plot of fluorescence intensity  $(F-F_0)_{555}$  of  $L_2$  ( $1\mu\text{M}$ ) as a function of equivalents of added  $\text{Fe}^{2+}$  ions in **dry**  $\text{CH}_3\text{CN}$ . (b) Double reciprocal plot of change in fluorescence against concentration  $\text{Fe}^{2+}$  ions added for determination of complex association constant ( $K_a$ ).

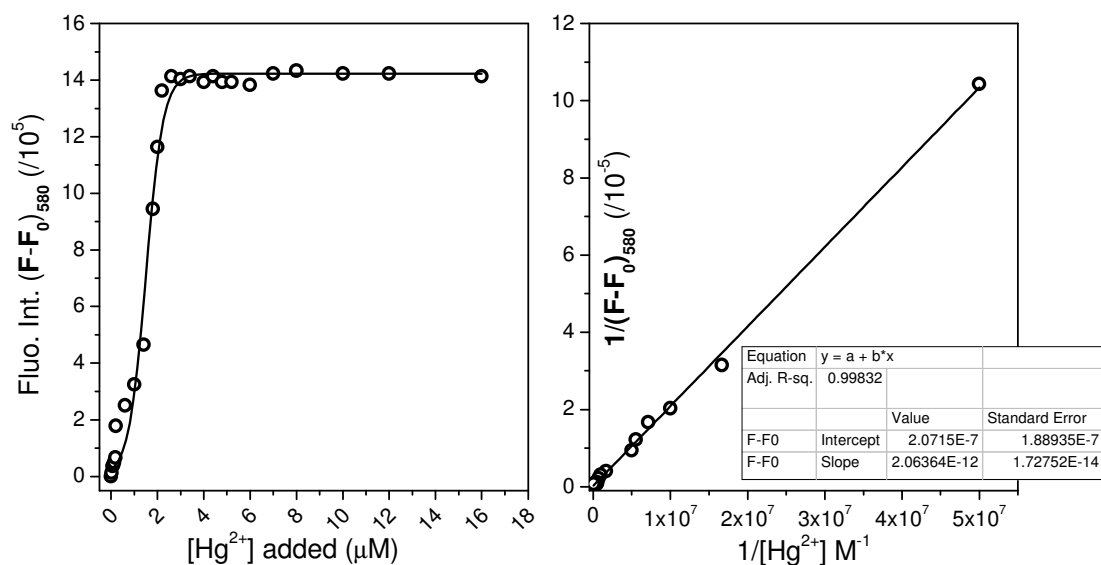

**Fig. S16.** (a) Plot of fluorescence intensity  $(F-F_0)_{580}$  of **L**<sub>4</sub> (1 $\mu$ M) as a function of concentration of added  $Hg^{2+}$  ions in  $CH_3CN-H_2O$  (9.5: 0.5 v/v). (b) Double reciprocal plot of change in fluorescence against concentration  $Hg^{2+}$  ions added, reciprocal of the slope of linear regression determines  $K_a$ .

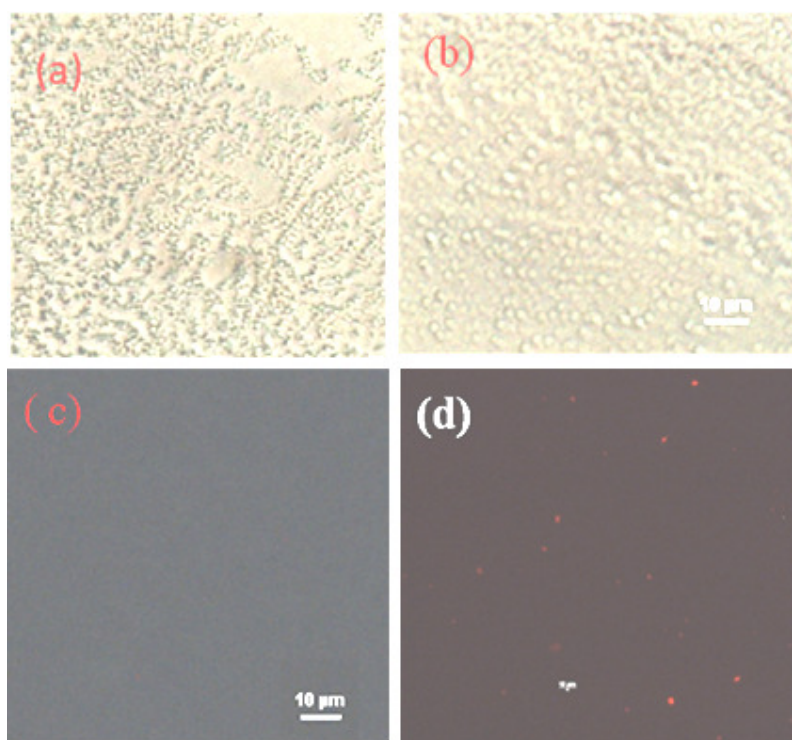

**Fig. S17.** Bright field images of *E. Coli* alone (a) and when incubated with **L**<sub>2</sub>(b). Their fluorescence image on incubation with **L**<sub>2</sub> before(c) and after(d) addition of  $Pb^{2+}$  ion,  $\lambda_{ex} \approx 350nm$ .

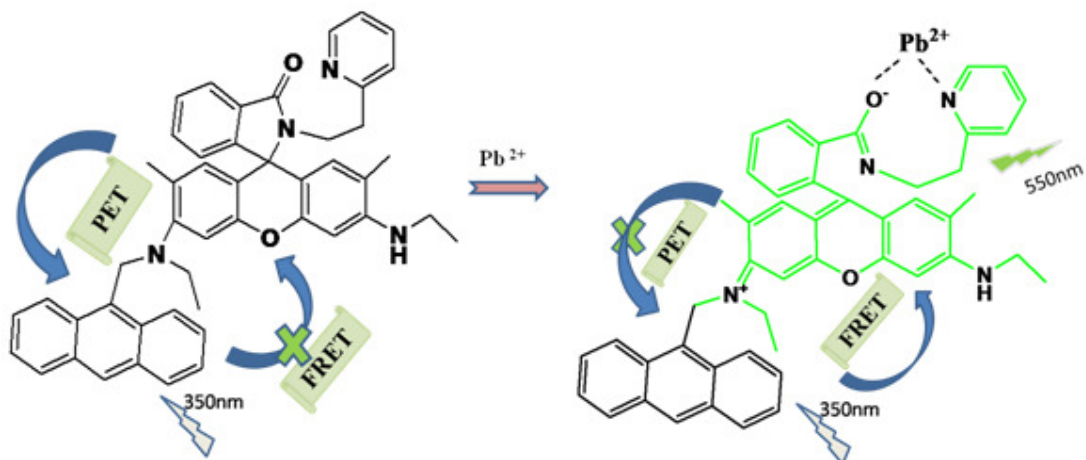

**Fig. S18.** Pictorial representation of modulation various operation processes in  $L_2$  in absence and presence of  $Pb^{2+}$  showing signal mechanism.

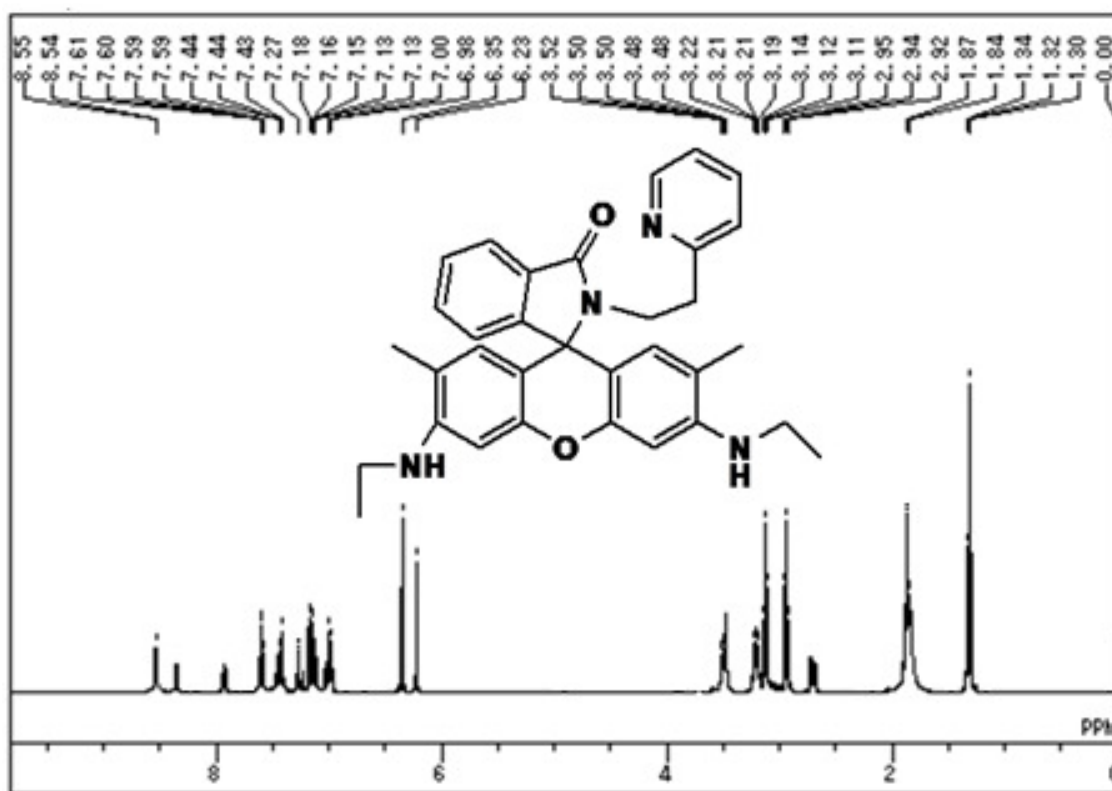

**Fig. S19.**  $^1H$ -NMR spectrum of  $L_1$  in  $CDCl_3$

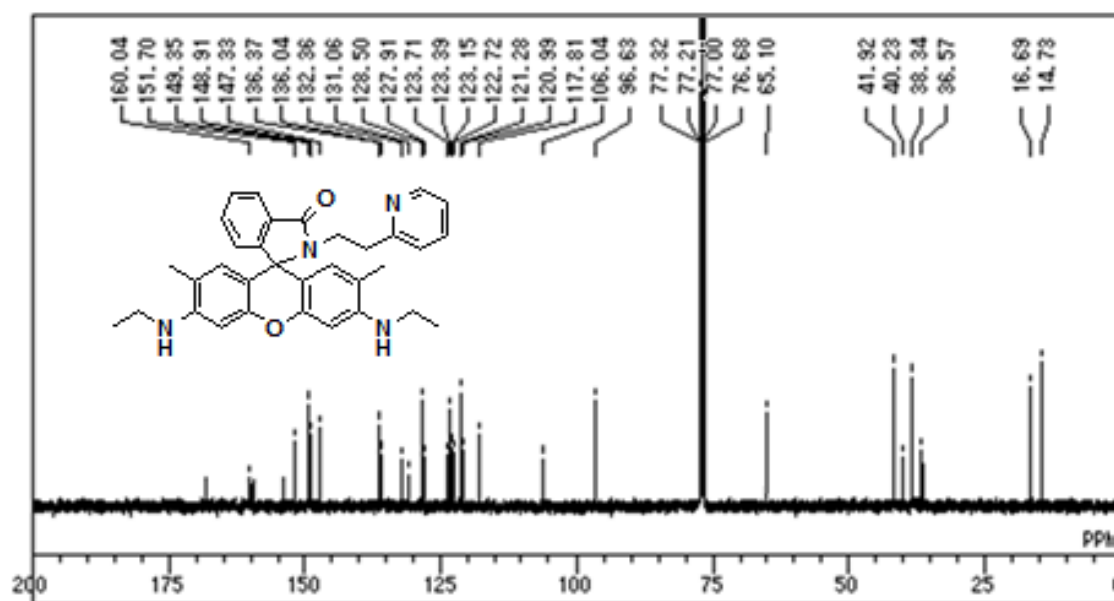

**Fig. S20.** <sup>13</sup>C-NMR spectrum of L<sub>1</sub> in CDCl<sub>3</sub>

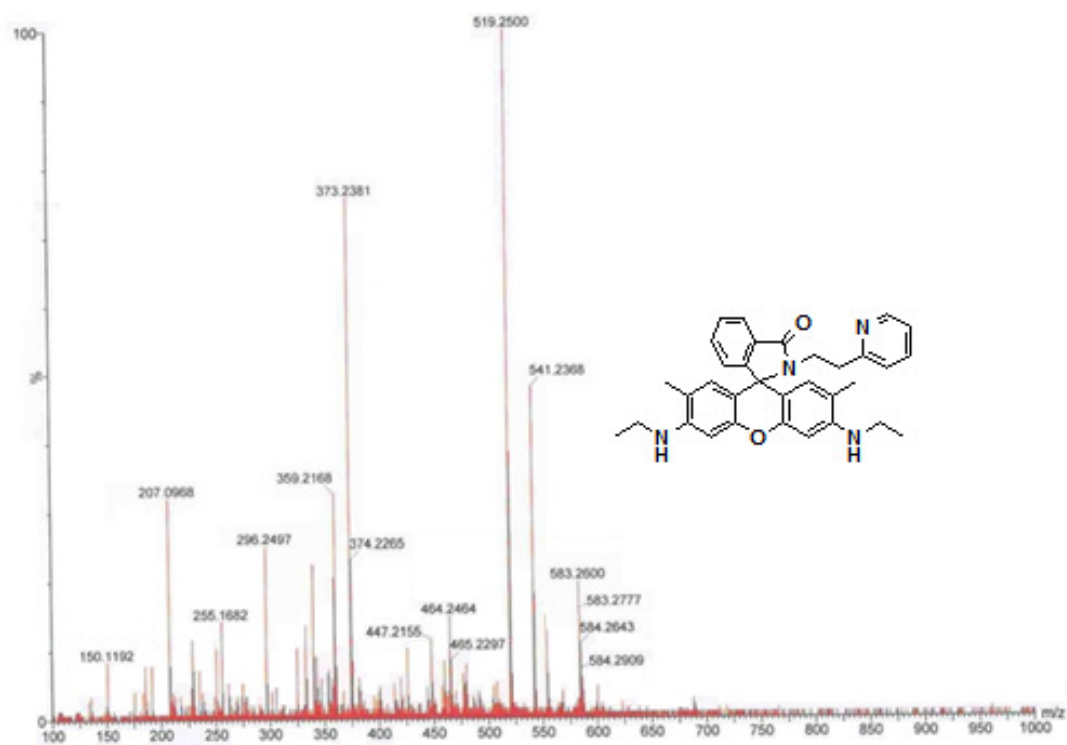

**Fig. S21.** ESI-MS spectrum of L<sub>1</sub>

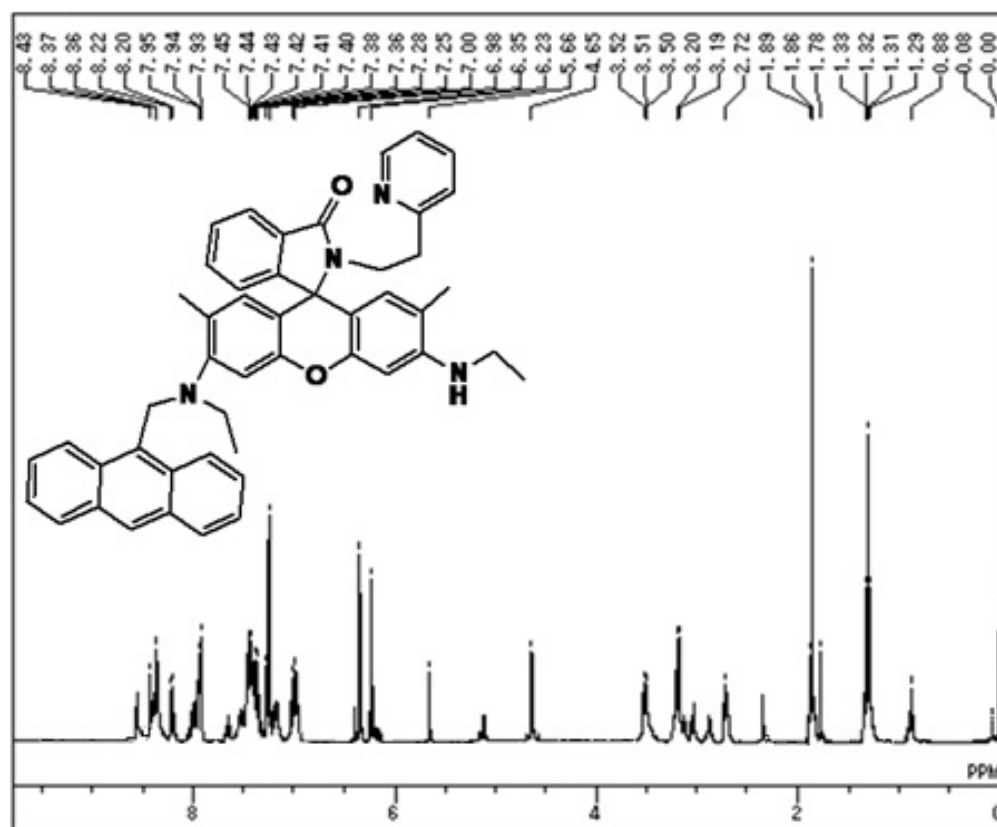

Fig. S22.  $^1\text{H}$ -NMR spectrum of  $\text{L}_2$  in  $\text{CDCl}_3$

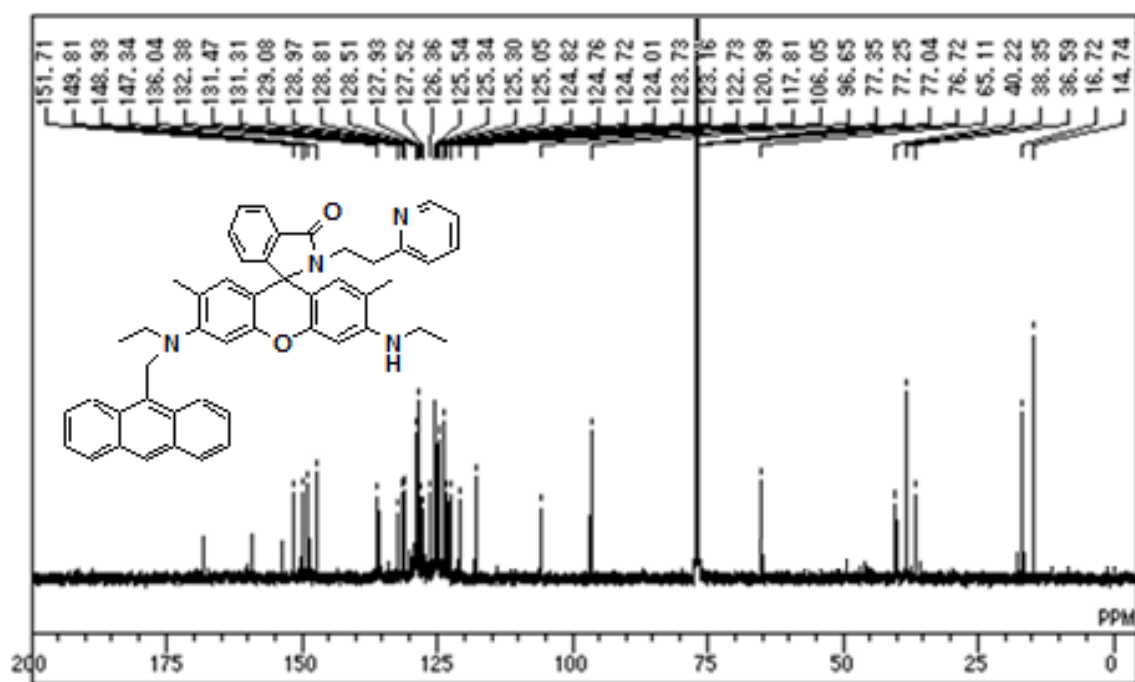

Fig. S23.  $^{13}\text{C}$ -NMR spectrum of  $\text{L}_2$  in  $\text{CDCl}_3$

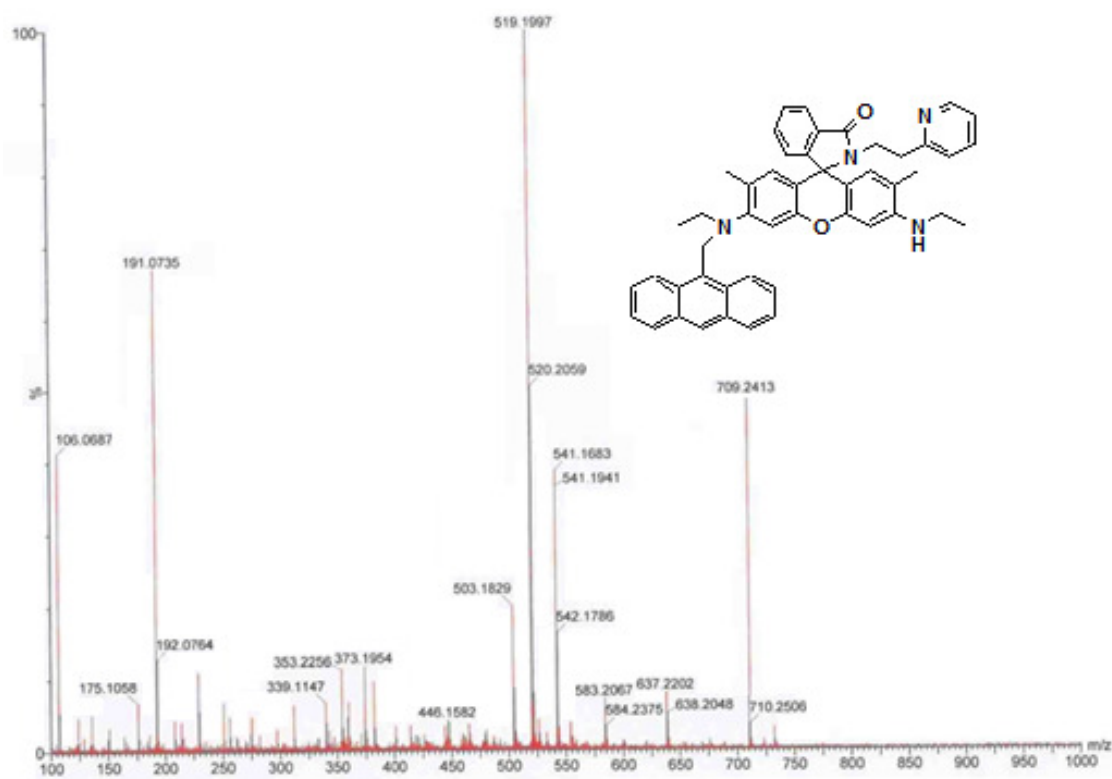

**Fig. S24.** ESI-MS spectrum of **L<sub>2</sub>**

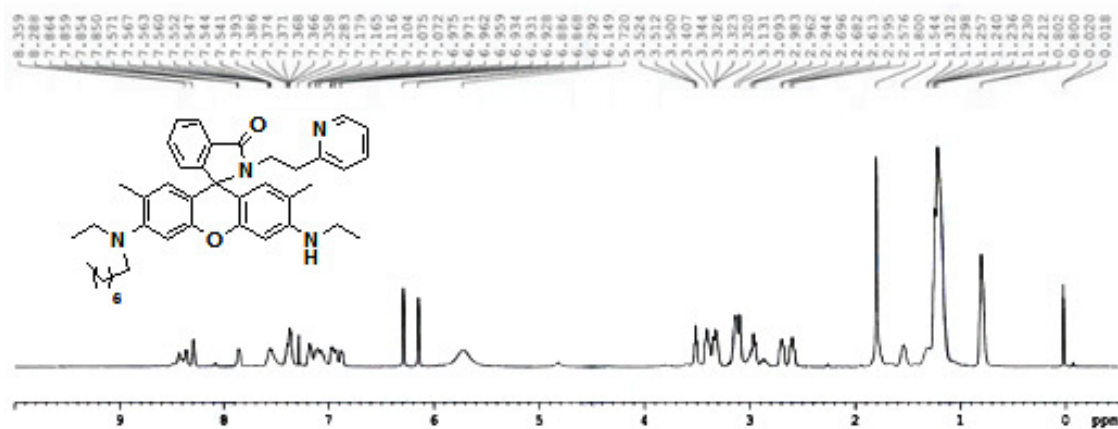

**Fig. S25.** <sup>1</sup>H-NMR spectrum of **L<sub>3</sub>** in CDCl<sub>3</sub>

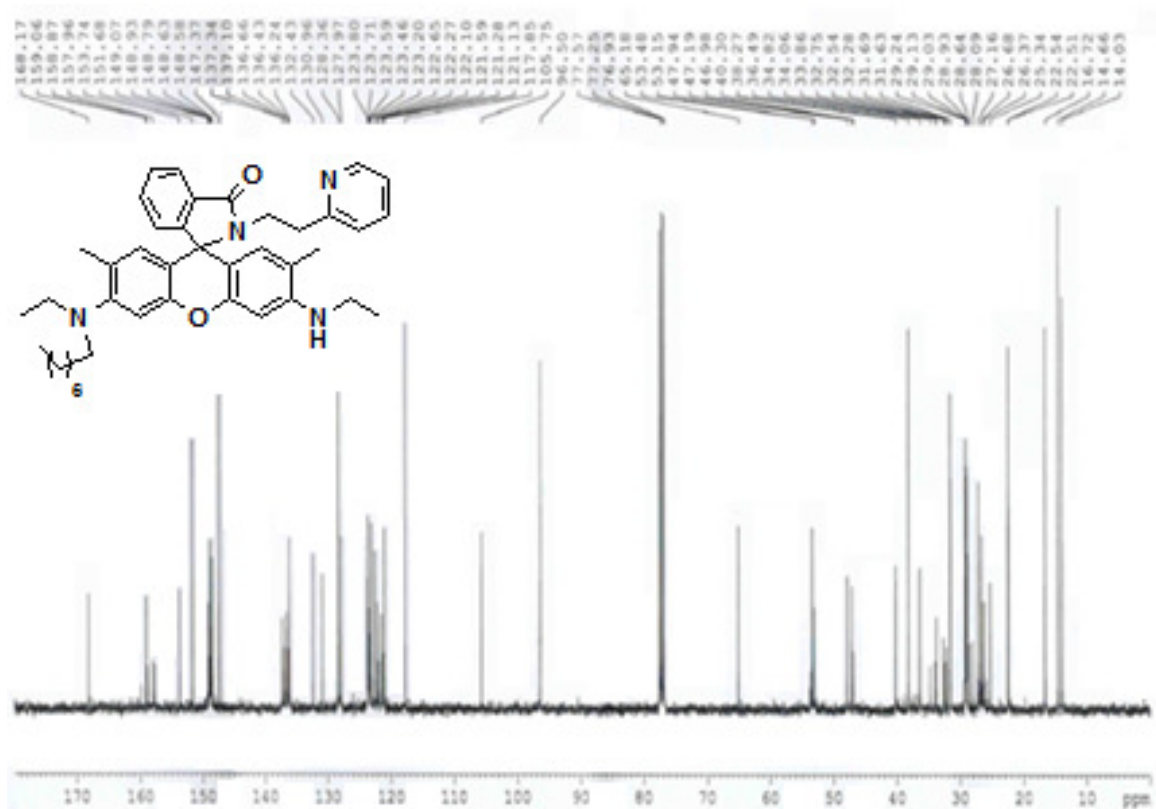

**Fig. S26.**  $^{13}\text{C}$ -NMR spectrum of **L3** in  $\text{CDCl}_3$

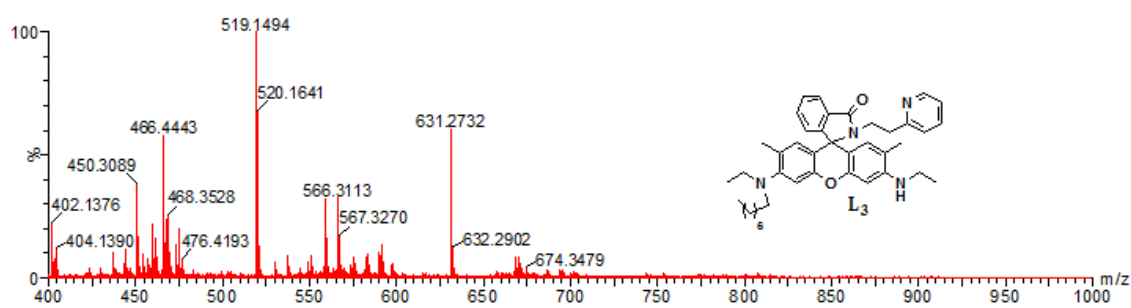

**Fig. S27.** ESI-MS spectrum of **L3**

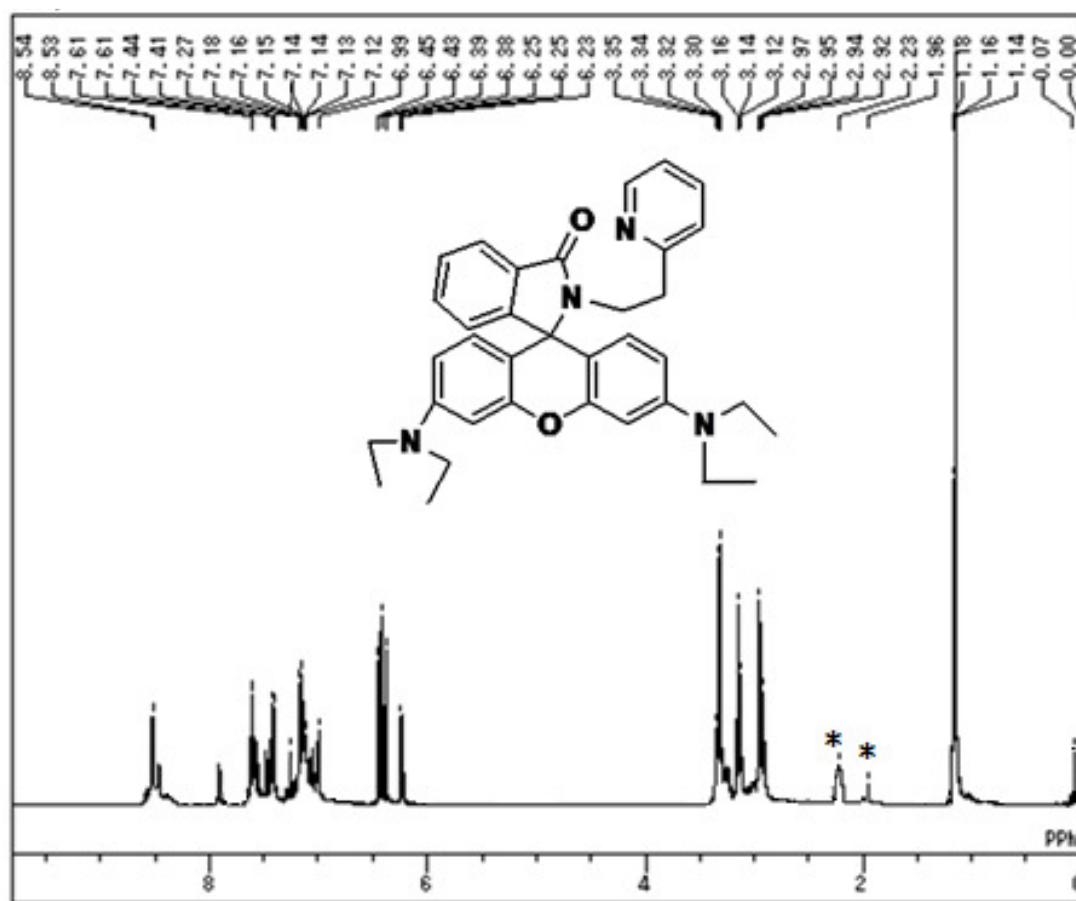

Fig. S28.  $^1\text{H-NMR}$  spectrum of **L4** in  $\text{CDCl}_3$

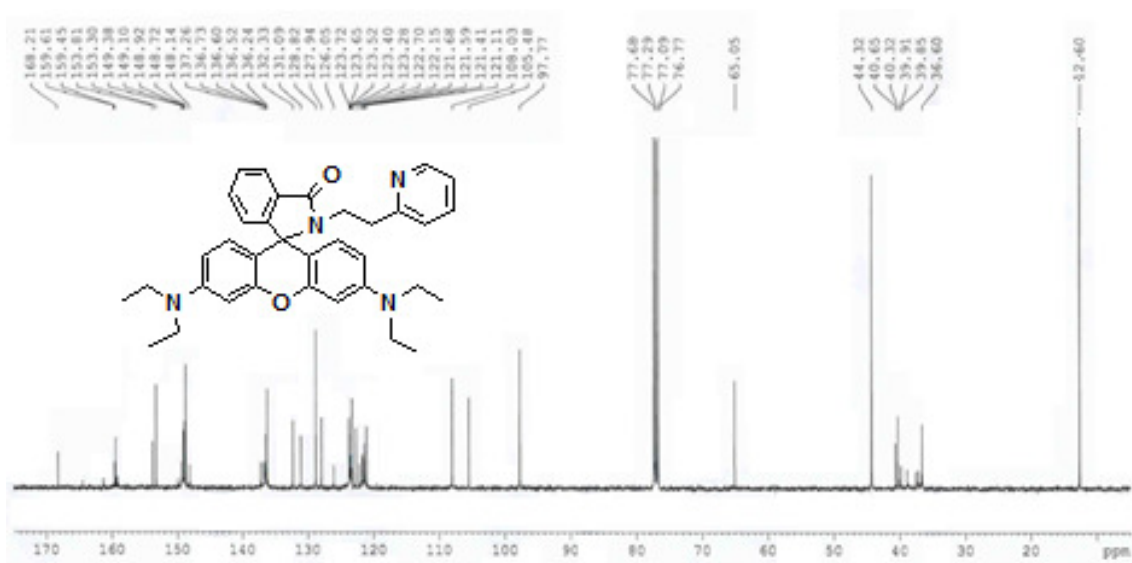

Fig. S29.  $^{13}\text{C-NMR}$  spectrum of **L4** in  $\text{CDCl}_3$

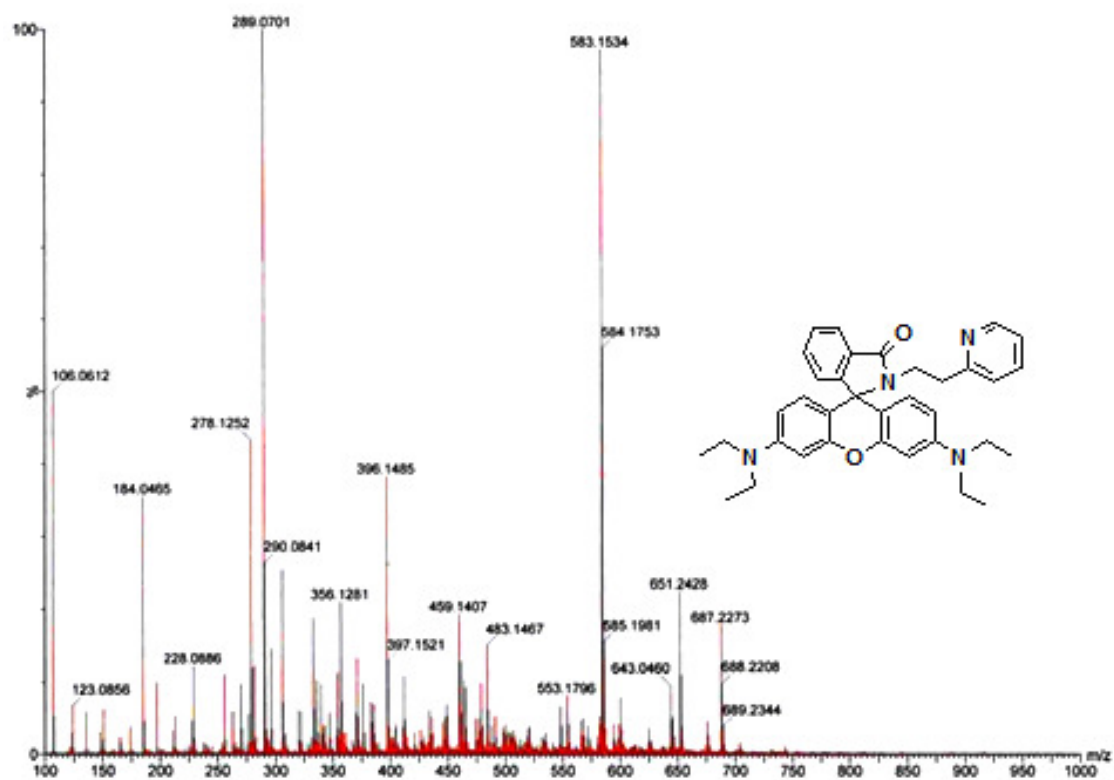

Fig. S30. ESI-MS spectrum of **L<sub>4</sub>**
